# Supplementary material for: Carbonyl compounds from typical combustion sources: emission characteristics, influencing factors, and their contribution to ozone formation
Source: Copernicus journal article supplement (doi:10.5194/egusphere-2025-131), 2025-03-05
Supplement: Supplementary file 1 [file egusphere-2025-131-supplement.pdf]

*Supplementary of*

## **Carbonyl compounds from typical combustion sources: emission characteristics, influencing factors, and their contribution to ozone formation**

5 Yanjie Lu<sup>1</sup>, Xinxin Feng<sup>2</sup>, Yanli Feng<sup>1\*</sup>, Minjun Jiang<sup>1</sup>, Yu Peng<sup>2</sup>, Tian Chen<sup>3,4</sup>, Yingjun Chen<sup>2,5\*</sup>

<sup>1</sup>Institute of Environmental Pollution and Health, School of Environmental and Chemical Engineering, Shanghai University, Shanghai 200444, China

<sup>2</sup>Shanghai Key Laboratory of Atmospheric Particle Pollution and Prevention (LAP<sup>3</sup>), Department of Environmental Science  
10 and Engineering, Fudan University, Shanghai 200438, China.

<sup>3</sup>Department of Environmental Health, Shanghai Municipal Center for Disease Control and Prevention, Shanghai 200336, China.

<sup>4</sup>State Environmental Protection Key Laboratory of the Assessment of Effects of Emerging Pollutants on Environmental and Human Health, Shanghai Municipal Center for Disease Control and Prevention, Shanghai 200336, China.

15 <sup>5</sup>Shanghai Institute of Pollution Control and Ecological Security, Shanghai 200092, China.

*Correspondence to:* Yanli Feng ([fengyanli@shu.edu.cn](mailto:fengyanli@shu.edu.cn)) and Yingjun Chen ([yjchenfd@fudan.edu.cn](mailto:yjchenfd@fudan.edu.cn))

**Text S1 Quality assurance/ quality control (QA/QC)**

20 Before sampling, the entire combustion system and combustion setup were inspected, and the flow  
rate was measured before each sample collection to ensure that the system was airtight. Additionally, 3 to  
5 laboratory blanks were prepared for each batch of sample tubes. During sampling, a field blank group  
was included, which was identical to the sample tubes in all conditions except for not being connected to  
the sampler, and it was analyzed together with the samples. Each group of samples included 2 to 4  
25 replicate samples to eliminate randomness. To prevent breakthrough, two identical sampling tubes were  
connected in series to the sampler. After processing and analysis, if the detected substance in the rear tube  
exceeded 3% of the total amount in both tubes, it was considered a breakthrough, and the results were  
deemed unusable. Moreover, the linear regression coefficient  $R^2$  of the standard curve for sample analysis  
was greater than 0.999. To ensure the stability of the instrument, a known concentration standard sample  
30 was inserted every 10 samples to ensure that the instrument deviation was within 10%.

**Table S1 Volatile content values of six raw coals.**

| Coal type | LL | GJ | DT    | SH | NM | PX |
|-----------|----|----|-------|----|----|----|
| Vdaf (%)  | 20 | 25 | 26~27 | 30 | 32 | 35 |

35

**Table S2 Basic information of on-road gasoline vehicles (ethanol gasoline).**

| Vehicle model     | Emission standard | Model year | Engine model  | Engine size (L) |
|-------------------|-------------------|------------|---------------|-----------------|
| Gasoline vehicles | China V           | 2016       | DAM15R1       | 1.5             |
|                   | China V           | 2017       | TNN4G115B     | 1.5             |
|                   | China V           | 2020       | LZW1028SP6    | 1.5             |
|                   | China V           | 2014       | LQG5029XXYBF  | 1.2             |
|                   | China VI          | 2017       | LZW1029PY     | 1.5             |
|                   | China VI          | 2021       | LZW5028CCYPWV | 1.5             |

40

**Table S3 Basic information of on-road diesel vehicles.**

| Vehicle model   | Emission standard | Model year | Mileage | Engine model | Engine size (L) |
|-----------------|-------------------|------------|---------|--------------|-----------------|
| Diesel vehicles | China V           | 2019       | 40068   | UK12030066   | 1.5             |
|                 | China V           | 2018       | 69000   | LJ4A15Q      | 1.5             |
|                 | China V           | 2018       | 100700  | H2116228     | 1.5             |
|                 | China VI          | 2021       | 13634   | LJ469Q-AEC   | 1.3             |
|                 | China VI          | 2021       | 39000   | DAM16KL      | 1.6             |
|                 | China VI          | 2021       | 98122   | LJ4A18Q6     | 1.8             |

45 **Table S4 Basic information of agricultural machinery sampling vehicles.**

| Machinery type   | Emission standard | Model year | Engine power(kW) | Tail gas treatment                   |
|------------------|-------------------|------------|------------------|--------------------------------------|
| Small Tractor    | China II          | 2015/2     | 11(<22.1)        | ECU、Intercooler、<br>Supercharger     |
| Medium Tractor   | China II          | 2014/2     | 73.5 (22.1<73.6) |                                      |
| Medium Tractor   | China III         | 2022/4     | 118 (>73.6)      |                                      |
| Small Harvester  | China III         | 2015/8     | 46               | ECU、EGR、Intercooler、<br>Supercharger |
| Medium Harvester | China III         | 2021/11    | 92               |                                      |

**Table S5 The MIR value of carbonyl compounds(Zhang et al., 2021) .**

| Carbonyl compounds       | MIR   |
|--------------------------|-------|
| Formaldehyde             | 6.71  |
| Acetaldehyde             | 4.10  |
| Acetone                  | 0.22  |
| Acrolein                 | 3.01  |
| Propionaldehyde          | 2.60  |
| Crotonaldehyde           | 3.97  |
| Butyraldehyde            | 4.54  |
| Benzaldehyde             | -1.02 |
| Cyclohexanone            | 0.97  |
| Isovaleraldehyde         | 3.75  |
| Valeraldehyde            | 6.27  |
| o-Tolualdehyde           | -1.19 |
| m-Tolualdehyde           | -1.16 |
| p-Tolualdehyde           | -0.65 |
| Hexaldehyde              | 5.72  |
| 2,5-Dimethylbenzaldehyde | 0     |
| Heptaldehyde             | 4.63  |

## References

1. Zhang, Y., Xue, L., Carter, W. P. L., Pei, C., Chen, T., Mu, J., Wang, Y., Zhang, Q., and Wang, W.:  
50 Development of ozone reactivity scales for volatile organic compounds in a Chinese megacity, *Atmos.*  
*Chem. Phys.*, 21, 11053–11068, <https://doi.org/10.5194/acp-21-11053-2021>, 2021.
