# Supplementary material for: Carbonyl compounds from typical combustion sources: emission characteristics, influencing factors, and their contribution to ozone formation
Source: Copernicus journal article supplement (doi:10.5194/egusphere-2025-131), 2025-03-05

Uncertainty analysis:

| Combustion sources | Max    | Min    |
|--------------------|--------|--------|
| BB                 | 21.5%  | -3.1%  |
| RCC                | 13.8%  | -10.9% |
| E-GV               | 3.66%  | -2.68% |
| GV                 | 3.84%  | -2.31% |
| DV                 | 8.38%  | -6.63% |
| AM                 | 10.27% | -4.52% |

The schematic diagram of the sampling system:

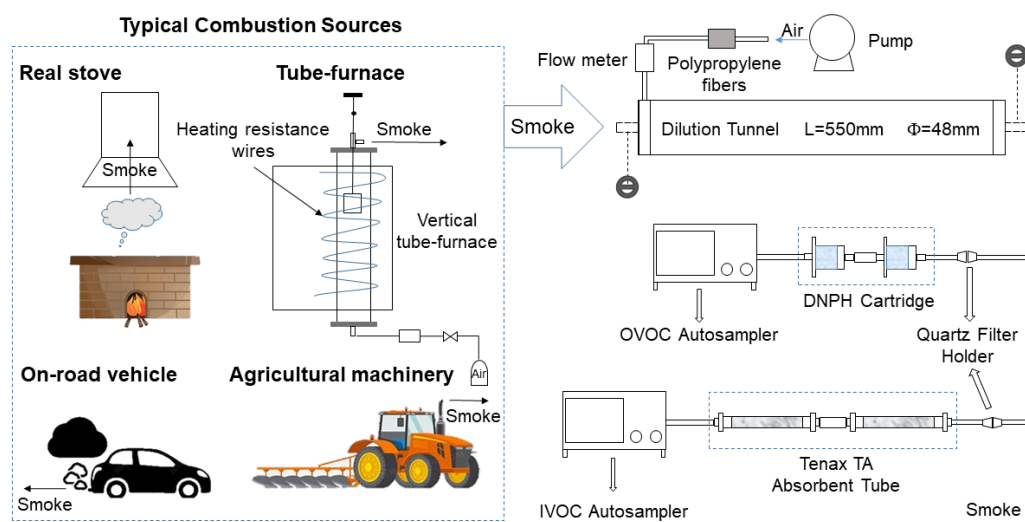

Supplement: Supplementary file [file egusphere-2025-131-AC3-supplement.pdf]
